# Supplementary material for: RNA-Seq of Borrelia burgdorferi in Multiple Phases of Growth Reveals Insights into the Dynamics of Gene Expression, Transcriptome Architecture, and Noncoding RNAs
Source: PLoS One. 2016 Oct 5;11(10):e0164165. doi: 10.1371/journal.pone.0164165 (PMC5051733; doi:10.1371/journal.pone.0164165)
Supplement: S3 Table — S2 Table, which containing the FPKMO expression levels of all 1386 annotated genes in the B. burgdorferi B31-A3 genome, was filtered to identify ORFs which were not present at greater than 10 FPKMO in any sample at any growth phase. Columns list each genetic element, ORF identification number, and expression levels in three biological replicates at all three phases of growth. (XLSX) [file pone.0164165.s004.xlsx]

## Sheet: Sheet 1
Genetic Elements	Gene	Early 1	Early 2	Early 3	Mid 1	Mid 2	Mid 3	Stationary 1	Stationary 2	Stationary 3
Chromosome	BB_0844_-_lipoprotein	4.12538	5.19897	6.51277	5.71486	4.67187	7.5526	8.17131	4.01822	4.74505
cp32-1	BB_P12_-_hypothetical_protein	9.35922	6.17826	7.38773	0	9.9366	5.71151	2.31727	2.73483	0.978642
cp32-1	BB_P17_-_hypothetical_protein	5.79779	6.57911	3.8831	0	3.18343	7.01778	3.13198	2.46423	1.32271
cp32-1	BB_P36_bppB_protein_BppB	2.35632	5.65624	9.09319	0	8.22777	9.67353	8.16771	7.34436	7.8844
cp32-1	BB_P37_bppC_site-specific_recombinase	0	3.4076	0.452742	0	2.07041	1.57508	7.02946	0.502795	2.15907
cp32-3	BB_S03_-_hypothetical_protein	3.59582	7.33687	8.8305	9.96253	6.44759	9.57542	1.7806	7.70532	3.00796
cp32-3	BB_S10_-_hypothetical_protein	5.30797	8.06964	3.72432	0	5.51019	7.65632	0	0	5.92026
cp32-3	BB_S11_-_hypothetical_protein	5.40344	8.64714	5.52899	3.74267	5.86426	7.6941	5.79735	2.4561	3.39004
cp32-3	BB_S13_-_hypothetical_protein	9.90432	8.98162	4.63289	0	4.77733	9.52413	6.53929	1.71503	3.68227
cp32-3	BB_S16_-_hypothetical_protein	4.3987	8.79906	9.00181	4.06232	6.22674	9.11044	5.08239	3.99881	2.45305
cp32-3	BB_S17_-_hypothetical_protein	3.16243	7.08519	2.58873	0	3.78033	3.62585	4.17597	1.23211	2.64542
cp32-3	BB_S27_-_hypothetical_protein	7.89777	9.09995	2.21658	0	4.47199	6.65988	3.12868	7.38491	3.96396
cp32-3	BB_S39_bppB_protein_BppB	0	2.2625	2.89329	0	5.5593	4.18315	1.16682	7.34436	0
cp32-3	BB_S40_bppC_protein_BppC	1.29051	1.54891	0.679113	0	2.80114	0.572757	1.27808	1.00559	0
cp32-4	BB_R05_-_hypothetical_protein	6.0957	5.85298	8.85957	4.82533	5.75267	8.5027	8.62429	6.78555	2.18535
cp32-4	BB_R06_-_hypothetical_protein	8.87614	7.26937	6.22792	2.89318	6.99695	8.22644	4.65388	2.03425	4.80443
cp32-4	BB_R07_-_hypothetical_protein	7.70336	3.16998	8.10756	0	6.85444	7.32625	5.44941	2.57254	1.84114
cp32-4	BB_R10_-_hypothetical_protein	9.73128	5.52133	1.5518	7.35308	6.01112	4.51527	3.50457	0	2.96013
cp32-4	BB_R11_-_hypothetical_protein	4.50286	5.62064	3.31739	1.24756	7.1391	5.19602	4.90545	1.75436	4.52006
cp32-4	BB_R15_-_hypothetical_protein	4.63986	6.49704	7.32498	5.3563	4.81663	6.26362	6.89277	6.62836	6.7923
cp32-4	BB_R16_-_hypothetical_protein	7.56119	3.22672	5.01055	0	6.02569	5.40659	6.65633	3.92788	3.51392
cp32-4	BB_R17_-_hypothetical_protein	2.63536	2.78347	1.10946	2.92059	2.98447	4.44459	1.56599	0.821409	3.08633
cp32-4	BB_R37_bppB_BppB	4.71264	2.82812	0.826654	0	3.11321	4.44459	4.66726	4.59023	1.9711
cp32-4	BB_R38_bppC_BppC	8.19816	3.6331	0.663717	0	2.49959	3.35863	6.8701	3.93118	6.33036
cp32-6	BB_M05_-_hypothetical_protein	7.83733	7.52526	7.33206	0	4.60214	8.69594	2.58729	3.39278	2.18535
cp32-6	BB_M06_-_hypothetical_protein	6.78763	4.01068	3.29713	4.33978	8.08099	5.56153	5.17097	0.8137	0.873532
cp32-6	BB_M07_-_hypothetical_protein	4.40192	9.50995	7.72149	9.14691	5.60817	8.05888	2.17976	4.28757	0.920569
cp32-6	BB_M11_-_hypothetical_protein	4.05258	7.9986	6.31884	2.49511	6.79915	8.29364	2.22975	1.05262	3.76671
cp32-6	BB_M17_-_hypothetical_protein	4.74365	3.28955	0.739637	2.92059	1.79068	5.73119	3.13198	4.10705	3.08633
cp32-6	BB_M37_bppC_BppC	0	1.56098	0.228135	0	2.70023	0.86583	3.22011	1.52014	1.08794
cp32-6	BB_M39_-_hypothetical_protein	2.24874	1.79933	0.78891	0	0.990355	4.15849	5.19652	4.0886	1.25407
cp32-7	BB_O35_-_hypothetical_protein	0	0	0	0	3.69172	0.868084	0	0	0
cp32-7	BB_O38_bppC_protein_BppC	0	0	0.226371	3.57547	2.07041	2.43422	0.639042	0	1.07953
cp32-7	BB_O41_-_hypothetical_protein	0	0	0	0	0	0	0	0	0
cp32-8	BB_L17_-_hypothetical_protein	1.58122	3.28955	2.58873	0	5.17308	5.61422	4.17597	1.64282	1.32271
cp32-8	BB_L38_bppC_protein_BppC	0	2.78803	1.5846	1.78773	3.77545	3.43654	2.55617	1.50839	0.539766
cp32-9	BB_N10_-_hypothetical_protein	0.884662	7.64492	3.1036	0	4.34136	5.10421	2.62843	4.13607	4.4402
cp32-9	BB_N15_-_hypothetical_protein	5.5024	9.05709	3.58498	7.62243	4.1542	6.19243	7.78487	7.65638	2.95897
cp32-9	BB_N17_-_hypothetical_protein	0.527072	4.04868	0.554728	1.4603	2.18861	2.80711	3.65397	3.69634	0.881808
cp32-9	BB_N35_bppA_protein_BppA	6.42431	4.71709	4.37502	9.42305	3.28104	6.5411	8.60801	5.30041	4.7418
lp17	BB_D001_-_lipoprotein	2.58102	8.67388	4.52742	0	7.79449	8.59135	2.55617	0	6.4772
lp17	BB_D0027_-_hypothetical_protein	0	1.43946	3.15564	0	3.3955	1.99607	2.96944	0	2.50814
lp17	BB_D01_-_hypothetical_protein	1.0586	1.52467	1.85691	0	3.19689	2.81898	0	0	1.77107
lp17	BB_D04_-_hypothetical_protein	5.62605	4.72678	6.41469	0	6.10586	7.49089	1.39297	1.09598	2.35314
lp17	BB_D24_-_hypothetical_protein	0	0	0	0	0.410905	1.44932	0	0	0
lp21	BB_U01_-_hypothetical_protein	0	1.97581	0	7.60154	1.81248	1.2177	0	0	0
lp21	BB_U02_-_hypothetical_protein	0	2.61294	0.477347	0	0.770447	1.81165	4.04263	0	0
lp21	BB_U10_-_protein_BBC01	0	0	0	0	1.43921	0.564035	2.51724	3.96111	0
lp21	BB_U11_-_Sua5/YciO/YrdC/YwlC_family_protein	0	2.66562	1.41664	0	2.09595	4.59245	2.49948	0.393316	0
lp28-1	BB_F0040_-_hypothetical_protein	3.94267	9.46419	2.76636	0	0.744159	7.43682	0	4.6083	3.2981
lp28-1	BB_F01_-_hypothetical_protein	1.00344	1.92698	0.528048	0	0.473488	0.8907	1.98756	0.390951	0
lp28-1	BB_F02_-_hypothetical_protein	0	0.675254	0.493438	0	1.85831	1.87272	0	0	0
lp28-1	BB_F08_-_hypothetical_protein	0	0	0	0	0.565917	0.665358	2.96944	0	0
lp28-1	BB_F14_-_hypothetical_protein	0.972269	0.466777	1.70547	0	1.10107	1.29454	3.85162	0.75761	0
lp28-2	BB_G0036_-_hypothetical_protein	0	3.55607	0	0	2.23688	6.57484	0	0	0
lp28-2	BB_G18_-_hypothetical_protein	2.95119	8.50104	3.45116	0	4.27051	2.8379	7.79405	2.29962	3.29162
lp28-2	BB_G20_-_hypothetical_protein	3.90805	3.98696	3.59897	1.35345	3.1349	3.90257	4.35421	2.66457	4.90371
lp28-2	BB_G21_-_hypothetical_protein	3.36617	2.82812	4.4285	0	2.70023	4.48194	7.50095	2.29511	4.92775
lp28-2	BB_G22_-_hypothetical_protein	0.628254	0.603238	1.54284	1.74063	1.54154	5.1584	4.97763	0.979095	0.525544
lp28-2	BB_G23_-_hypothetical_protein	0	1.22962	1.3478	0	0.483418	2.84181	0.634139	0.498938	0
lp28-2	BB_G24_-_hypothetical_protein	0.569214	1.27528	0.399387	1.05137	1.36086	0.968413	2.06702	0.295695	0.634875
lp28-2	BB_G25_-_hypothetical_protein	0	2.49109	3.18561	0	1.2242	1.43931	1.28471	0	4.3405
lp28-2	BB_G26_-_hypothetical_protein	0	1.92827	0	0	0	2.37679	5.30371	0	2.23989
lp28-2	BB_G27_-_hypothetical_protein	0	0.69477	1.0154	0	0.54629	1.28456	1.43323	0	0.605287
lp28-2	BB_G28_-_hypothetical_protein	0	0.622773	1.36526	0	0.489679	0.575724	0	0	0
lp28-3	BB_H0042_-_hypothetical_protein	0	0	0	0	1.21946	0	0	0	0
lp28-3	BB_H02_-_hypothetical_protein	0	1.54426	0	0	1.82136	2.8552	3.18563	0	0.896914
lp28-3	BB_H04_-_hypothetical_protein	0	0.744243	0	0	0	0.688017	0	0	1.29678
lp28-3	BB_H05_-_hypothetical_protein	0	0	0.965186	0	1.03855	1.83156	5.44941	2.14379	0
lp28-3	BB_H09_-_type_II_restriction_enzyme_methylase_subunit	1.95797	5.07602	3.15975	2.89318	4.33614	5.06911	3.10258	6.5096	4.14928
lp28-3	BB_H09a_-_hypothetical_protein	0	0.582059	0	0	0.6865	0.538086	0	0	0
lp28-3	BB_H17_-_hypothetical_protein	0	3.77577	0	0	5.93768	2.90876	0	2.04277	0
lp28-3	BB_H41_-_membrane_protein	0	0	0	0	0.330448	0.388513	0.866952	0	0
lp28-4	BB_I01_-_hypothetical_protein	0	2.21558	0.809511	0	1.52432	1.28012	0	0.899008	0
lp36	BB_K0059_-_hypothetical_protein	0	0	0.949534	7.49882	5.10855	7.20745	0	2.10902	2.2641
lp36	BB_K09_-_hypothetical_protein	0	0	1.8556	0	5.3244	1.565	0	1.37384	1.47485
lp38	BB_J23_-_hypothetical_protein	4.33255	4.16003	4.99415	0	7.00926	5.90598	3.06487	6.752	4.14199
lp38	BB_J42_-_hypothetical_protein	0	0	0	0	0	0	0	0	0
lp5	BB_T01_-_hypothetical_protein	0	0	0	0	0	0	0	0	0
lp5	BB_T02_-_hypothetical_protein	0	0	0	0	0	0	0	0	0
lp5	BB_T03_-_hypothetical_protein	0	0	0	0	0.770447	0	0	0	0
lp5	BB_T06_-_Sua5/YciO/YrdC/YwlC_family_protein	4.03805	1.45397	1.77081	0	5.23987	3.58435	4.49906	0.393316	0
lp5	BB_T07_-_outer_membrane_protein	0	1.67325	0.407573	0	1.09638	1.80465	2.30114	0	0
lp54	BB_A05_-_S1_antigen	3.59654	5.18	3.36467	1.10717	3.92213	4.25659	1.97884	4.67082	2.00571
lp54	BB_A34_-_extracellular_solute-binding_protein,_family_5	1.26046	1.66412	1.5477	1.74611	2.0222	2.16775	5.30537	2.45544	0.790797
lp54	BB_A37_-_hypothetical_protein	0	2.78138	2.03247	0	2.81181	2.93857	2.45899	3.22454	1.38466
lp54	BB_A58_-_hypothetical_protein	0	1.18419	0.865339	0	1.86223	1.09473	0	0	2.06334
lp54	BB_A65_-_lipoprotein	1.18094	5.66958	2.48581	0	5.57241	3.53785	7.0174	0.920211	4.44543
lp56	BB_Q12_-_hypothetical_protein	0	5.01684	1.22201	4.82533	3.28724	8.69594	6.037	2.71422	5.09915
lp56	BB_Q13_-_hypothetical_protein	7.83189	4.51202	3.66348	4.33978	4.73033	7.29951	5.17097	0.8137	1.3103
lp56	BB_Q14_-_hypothetical_protein	3.30144	1.05666	1.93037	0	2.70023	4.63996	5.44941	2.57254	1.84114
lp56	BB_Q15_-_hypothetical_protein	5.22944	5.02121	4.58652	0	5.18191	7.54304	2.58954	3.05616	2.18725
lp56	BB_Q17_-_hypothetical_protein	0	1.27415	0.62072	4.90206	2.83858	2.55211	2.62843	0.689345	1.48007
lp56	BB_Q18_-_hypothetical_protein	0	3.0265	2.2116	0	2.3797	2.09839	1.33785	0	1.50669
lp56	BB_Q19_-_hypothetical_protein	0	8.4249	5.74601	0	3.53301	0.259614	4.63455	2.73483	0.978642
lp56	BB_Q24_-_hypothetical_protein	3.16243	4.30172	2.95855	7.30148	3.68084	2.92407	3.13198	4.92845	2.20452
lp56	BB_Q45_bppC_protein_BppC	0.645256	0.619563	0.452742	0	3.2883	3.29335	7.6685	4.52516	1.6193
lp56	BB_Q53_-_hypothetical_protein	7.07729	5.09662	1.5518	0	3.17253	5.69316	7.00914	4.82542	4.4402
lp56	BB_Q62_-_hypothetical_protein	0	0	0	0	0	0	0	0	0
lp56	BB_Q85_-_hypothetical_protein	0	3.37627	2.96063	7.79372	5.57492	2.80908	4.1789	2.19196	0
lp56	BB_Q88_-_hypothetical_protein	2.1172	2.54112	2.97106	0	1.39864	1.87932	0	0.824882	0.885536
