# Supplementary material for: RNA-Seq of Borrelia burgdorferi in Multiple Phases of Growth Reveals Insights into the Dynamics of Gene Expression, Transcriptome Architecture, and Noncoding RNAs
Source: PLoS One. 2016 Oct 5;11(10):e0164165. doi: 10.1371/journal.pone.0164165 (PMC5051733; doi:10.1371/journal.pone.0164165)
Supplement: S6 Table — (A) Genes are listed which were identified by DEseq as differentially expressed by meeting the criteria of >2X greater abundance and an adjusted p-value of <0.05. One hundred and twenty-nine genes were identified which met these criteria. (B) Genes are listed which were identified by DEseq as differentially expressed by meeting the criteria of >2X lower abundance and an adjusted p-value of <0.05. Ninety-eight genes were identified which met these criteria. In order from left to right columns list genetic element on which a given gene resides, the gene ID, the mean expression, the early-exponential expression, stationary expression, fold change, log2 fold change, p-value, adjusted p-value, stationary variance, and early-exponential variance. (XLSX) [file pone.0164165.s007.xlsx]

## Sheet: A. Genes up in E vs S
Genes increased from early-exponential to stationary
Genetic Element	Gene ID	Mean Expression	Early Expression	Stat Expression	Fold Change	Log2 Fold Change	P-Value	Adjusted P-Value	Stat Variance	Early Variance
Chromosome	BB_0007_-_hypothetical_protein	2636.97	1381.47	3892.48	2.81764	1.49449	3.16158e-15	2.18623e-13	3.89974	0.400317
Chromosome	BB_0016_-_GlpE_protein	3013.61	1962.61	4064.62	2.07103	1.05035	1.10545e-07	1.7178e-06	0.440087	0.276738
Chromosome	BB_0026_-_bifunctional_methylenetetrahydrofolate_dehydrogenase/methenyltetrahydrofolate_cyclohydrolase	2222.07	1377.08	3067.07	2.22723	1.15525	1.55844e-10	4.99578e-09	3.13899	1.1115
Chromosome	BB_0061_trx_thioredoxin	3672.35	2008.18	5336.52	2.65739	1.41001	4.89803e-13	2.18515e-11	1.17813	0.0235918
Chromosome	BB_0083_-_hypothetical_protein	1415.72	741.147	2090.29	2.82035	1.49587	7.03843e-14	3.89366e-12	3.91616	0.528962
Chromosome	BB_0135_hisS_histidine--tRNA_ligase	3277.52	2064.72	4490.32	2.17478	1.12087	7.98573e-09	1.75306e-07	2.84317	0.00217367
Chromosome	BB_0137_-_long-chain-fatty-acid_CoA_ligase	12123.9	7632.8	16615	2.17679	1.1222	1.28066e-08	2.60464e-07	2.16383	0.323265
Chromosome	BB_0138_-_hypothetical_protein	753.165	423.538	1082.79	2.55654	1.35419	4.13452e-12	1.63373e-10	2.59973	0.0914512
Chromosome	BB_0153_-_superoxide_dismutase	2456.83	1511.59	3402.08	2.25065	1.17034	5.1888e-09	1.23726e-07	3.88997	0.125484
Chromosome	BB_0166_malQ_4-alpha-glucanotransferase	357.22	229.392	485.048	2.11449	1.08031	7.39643e-07	9.38465e-06	1.17462	0.355387
Chromosome	BB_0179_trmE_tRNA_modification_GTPase	5449.14	2857.2	8041.08	2.81432	1.49279	8.71598e-15	5.24096e-13	3.33192	0.121956
Chromosome	BB_0253_lon_ATP-dependent_protease_La	8656.86	5516.55	11797.2	2.1385	1.0966	1.30647e-08	2.61862e-07	5.12915	0.308119
Chromosome	BB_0269_-_ATP-binding_protein	10111.5	5744.34	14478.6	2.52049	1.33371	1.85201e-12	7.53334e-11	5.40483	0.509941
Chromosome	BB_0300_ftsA_cell_division_protein_FtsA	11587.5	7237.89	15937.2	2.20191	1.13876	6.08393e-09	1.40235e-07	3.71492	0.741183
Chromosome	BB_0331_-_hypothetical_protein	11.4254	4.54742	18.3034	4.025	2.00899	0.00165636	0.00660157	0.46307	0.289988
Chromosome	BB_0386_rpsG_30S_ribosomal_protein_S7	13324.5	7631.37	19017.7	2.49204	1.31733	1.04029e-10	3.5968e-09	6.03019	1.21671
Chromosome	BB_0394_nusG_transcription_termination/antitermination_factor	10030.5	6477.83	13583.2	2.09687	1.06824	2.02076e-08	3.88154e-07	3.01917	1.53838
Chromosome	BB_0395_secE_protein_translocase_subunit_SecE	4800.38	3199.82	6400.94	2.0004	1.00029	7.20144e-08	1.14867e-06	2.49515	0.845321
Chromosome	BB_0488_rplN_50S_ribosomal_protein_L14	1905.64	1247.85	2563.44	2.05429	1.03864	4.38696e-08	7.46208e-07	2.29978	2.11117
Chromosome	BB_0495_rpsE_30S_ribosomal_protein_S5	3165.93	1597.59	4734.26	2.96337	1.56724	5.4089e-17	4.987e-15	2.71293	0.597146
Chromosome	BB_0508_engA_GTPase_Der	8715.7	5651.58	11779.8	2.08434	1.05959	2.23744e-08	4.23888e-07	2.17334	0.602512
Chromosome	BB_0534_xth_exodeoxyribonuclease_III	863.733	552.895	1174.57	2.1244	1.08706	4.40933e-08	7.46208e-07	1.52978	0.418023
Chromosome	BB_0536_-_zinc_protease	1841.73	1227.42	2456.03	2.00097	1.0007	6.49882e-07	8.47912e-06	2.53645	0.107038
Chromosome	BB_0578_-_methyl-accepting_chemotaxis_protein	3418.8	2190.56	4647.03	2.12139	1.08501	1.65888e-08	3.23131e-07	2.90421	0.0271837
Chromosome	BB_0599_cysS_cysteine--tRNA_ligase	3547.7	2135.9	4959.5	2.32197	1.21535	5.45372e-10	1.60479e-08	3.46303	0.322159
Chromosome	BB_0621_-_4-methyl-5(b-hydroxyethyl)-thiazole_monophosphate_biosynthesis_protein	1483.86	802.376	2165.34	2.69866	1.43224	1.77069e-13	8.44437e-12	6.62456	0.137972
Chromosome	BB_0628_-_lipoprotein	3851.62	2088.86	5614.38	2.68778	1.42641	8.19096e-14	4.19559e-12	4.67354	0.0447392
Chromosome	BB_0656_-_oxygen-independent_coproporphyrinogen_III_oxidase	981.269	600.552	1361.99	2.26789	1.18135	3.09216e-09	7.91938e-08	0.653958	0.0404563
Chromosome	BB_0698_trmD_tRNA_(guanine-N(1)-)-methyltransferase	7492.16	3795.96	11188.4	2.94744	1.55946	9.67e-16	7.86683e-14	2.38211	0.0405438
Chromosome	BB_0705_rnc_ribonuclease_III	5667.8	3742.85	7592.75	2.0286	1.02048	4.63623e-08	7.7252e-07	2.95652	0.763593
Chromosome	BB_0714_-_hypothetical_protein	4013.42	2568.07	5458.77	2.12563	1.08789	4.80535e-09	1.17744e-07	1.46935	0.446192
Chromosome	BB_0715_-_cell_division_protein_FtsA	8458.08	5216.04	11700.1	2.24311	1.1655	1.72267e-09	4.58164e-08	1.61349	0.792476
Chromosome	BB_0723_-_adenylyl_cyclase	58.3853	36.8585	79.9121	2.16808	1.11642	0.00262093	0.00941494	2.47518	0.027265
Chromosome	BB_0738_valS_valine--tRNA_ligase	8145.1	4467.53	11822.7	2.64636	1.40401	6.34551e-13	2.74245e-11	4.08461	0.0955574
Chromosome	BB_0745_-_endonuclease_III	179.523	95.6163	263.429	2.75506	1.46209	4.6971e-09	1.17744e-07	1.68133	0.289643
Chromosome	BB_0749_-_hypothetical_protein	16520.8	7742.33	25299.3	3.26766	1.70826	1.53523e-19	2.12323e-17	6.59062	0.717094
Chromosome	BB_0760_-_protein_Gp37	444.622	291.228	598.016	2.05343	1.03804	9.84097e-06	8.34973e-05	2.09542	0.66627
Chromosome	BB_0761_-_peptidoglycan-binding_protein	550.799	330.794	770.805	2.33017	1.22043	1.85842e-09	4.84942e-08	1.53604	0.0722318
Chromosome	BB_0804_rpsO_30S_ribosomal_protein_S15	2461.71	1497.35	3426.08	2.28809	1.19415	2.71664e-10	8.34913e-09	4.14923	0.19648
Chromosome	BB_0805_-_polyribonucleotide_nucleotidyltransferase	27476.4	15942.1	39010.7	2.44702	1.29102	3.31159e-11	1.17434e-09	3.93159	0.693778
Chromosome	BB_0816_-_hypothetical_protein	4626.48	2894.46	6358.51	2.19679	1.13539	7.41211e-09	1.65338e-07	3.64039	0.413439
Chromosome	BB_0824_-_hypothetical_protein	4488.56	2919.25	6057.88	2.07515	1.05321	1.34897e-07	2.00605e-06	0.943984	0.0369856
Chromosome	Rfam_ncRNA1_NC_001318_SRP_bact_Rfam_annotation	20185	3242.24	37127.7	11.4513	3.51744	3.9028e-73	5.39758e-70	19.6394	0.035712
cp32-1	BB_P29_-_hypothetical_protein	27.9511	18.144	37.7582	2.08103	1.0573	0.00514596	0.017026	0.455423	0.498024
cp32-1	BB_P35_bppA_protein_BppA	32.4518	21.0828	43.8208	2.07851	1.05555	0.0115264	0.0330043	0.0819289	0.60734
cp32-3	BB_S31_-_hypothetical_protein	23.5388	12.4914	34.5862	2.76881	1.46927	0.0049315	0.0165139	0.972597	0.139971
cp32-3	BB_S33_-_hypothetical_protein	1900.04	1198.03	2602.04	2.17194	1.11898	1.14674e-08	2.40294e-07	11.2901	1.41361
cp32-3	BB_S34_-_hypothetical_protein	299.922	195.51	404.335	2.0681	1.04831	4.71016e-05	0.000321475	2.84474	0.430432
cp32-3	BB_S38_bppA_protein_BppA	25.0902	13.5152	36.6651	2.71287	1.43982	0.000558633	0.0026826	1.07031	0.400618
cp32-3	BB_S44_-_hypothetical_protein	70.1061	46.2696	93.9427	2.03033	1.02172	0.00223902	0.00841458	0.0102522	0.25622
cp32-4	BB_R27_bdrH_BdrH	321.812	180.606	463.018	2.56369	1.35822	1.22599e-08	2.53065e-07	2.27058	0.309551
cp32-4	BB_R31_-_hypothetical_protein	1229.18	646.723	1811.64	2.80127	1.48608	1.39662e-14	8.04803e-13	6.42984	0.407768
cp32-4	BB_R32_-_hypothetical_protein	454.699	195.311	714.086	3.65615	1.87033	1.24118e-18	1.22611e-16	8.57445	0.0373075
cp32-4	BB_R33_-_plasmid_partition_protein,_putative	348.192	224.083	472.301	2.10771	1.07568	4.97674e-06	4.85521e-05	2.53359	0.367124
cp32-4	BB_R36_bppA_BppA	28.7579	14.4708	43.0449	2.97459	1.57269	0.00209972	0.00802184	0.822582	0.566272
cp32-4	BB_R44_-_hypothetical_protein	82.1619	30.5715	133.752	4.37506	2.1293	1.5894e-10	4.99578e-09	2.63666	0.152322
cp32-4	BB_R45_-_phage_terminase_large_subunit	36.634	21.0382	52.2297	2.48261	1.31186	0.000941958	0.00413478	0.495407	0.117479
cp32-6	BB_M35_bppA_BppA	38.0337	20.6895	55.378	2.67663	1.42042	0.000192634	0.00108298	1.03702	0.22243
cp32-6	BB_M36_bppB_BppB	11.4448	5.56634	17.3232	3.11213	1.6379	0.00528467	0.0173603	0.324354	0.0449509
cp32-6	BB_M41_-_hypothetical_protein	39.1914	20.7162	57.6666	2.78364	1.47697	4.74193e-05	0.000321475	4.83728	0.954079
cp32-7	BB_O30_-_hypothetical_protein	1164.73	765.293	1564.17	2.04388	1.03131	3.34116e-08	6.04773e-07	2.73222	1.72269
cp32-7	BB_O36_bppA_protein_BppA	31.9327	15.4988	48.3667	3.12068	1.64186	0.000164306	0.000942887	0.73474	0.0168726
cp32-8	BB_L30_-_hypothetical_protein	1824.4	1070.05	2578.75	2.40994	1.269	1.26619e-11	4.73282e-10	7.25339	1.90043
cp32-9	BB_N03_-_hypothetical_protein	21.5615	14.2306	28.8924	2.0303	1.02169	0.0109771	0.0316279	2.50031	0.904279
cp32-9	BB_N27_bdrR_BdrR_protein	421.455	246.862	596.048	2.4145	1.27172	1.12013e-08	2.38329e-07	2.00655	0.0443156
cp32-9	BB_N28_mlpI_lipoprotein	286.557	170.038	403.076	2.3705	1.24519	6.70541e-09	1.52026e-07	3.07436	0.733609
cp32-9	BB_N30_-_hypothetical_protein	1505.13	709.222	2301.04	3.24445	1.69798	5.58458e-19	6.43623e-17	11.1719	0.456149
cp32-9	BB_N31_-_hypothetical_protein	214.165	133.972	294.359	2.19718	1.13565	8.84802e-05	0.000556219	2.25694	0.883644
cp32-9	BB_N36_bppB_protein_BppB	14.7046	7.95341	21.4558	2.69769	1.43172	0.00108615	0.00460781	0.338819	1.12118
cp32-9	BB_N42_-_hypothetical_protein	21.0275	7.79016	34.2649	4.39848	2.13701	7.86107e-06	6.96914e-05	1.12636	0.141823
lp17	BB_D10_-_lipoprotein	506.014	272.05	739.978	2.72	1.44361	8.48091e-12	3.25808e-10	1.75748	0.0541042
lp17	BB_D21_-_hypothetical_protein	1466.47	611.293	2321.64	3.79791	1.92521	8.02251e-25	1.84919e-22	5.64345	0.0955018
lp17	BB_D22_-_hypothetical_protein	240.269	146.995	333.543	2.26908	1.18211	4.51154e-06	4.45676e-05	1.20213	0.168995
lp21	BB_U05_-_PF-32_protein	235.874	144.174	327.575	2.27209	1.18402	1.86574e-06	2.09782e-05	5.35018	0.100194
lp28-1	BB_F0034_-_hypothetical_protein	42.7498	27.7322	57.7673	2.08304	1.05869	0.00791374	0.0240015	0.584977	0.025243
lp28-1	BB_F06_-_hypothetical_protein	38.3986	13.538	63.2592	4.67272	2.22426	1.65507e-07	2.40943e-06	2.27491	0.224443
lp28-1	BB_F17_-_putative_transmembrane_protein	33.8774	17.6908	50.064	2.82995	1.50078	0.00101795	0.00437625	1.394	0.152845
lp28-1	BB_F20_-_BBF20	141.317	77.0558	205.579	2.66793	1.41572	5.97547e-06	5.58384e-05	4.97857	1.06737
lp28-2	BB_G07_-_hypothetical_protein	654.913	416.255	893.572	2.1467	1.10212	1.45009e-06	1.68779e-05	1.86905	0.830016
lp28-2	frameshift_BB_G03_BB_G03	48.9835	30.6136	67.3534	2.20011	1.13758	0.00630232	0.0202416	0.755367	1.76548
lp28-3	BB_H13_-_protein_RepU	1121.39	540.61	1702.17	3.14861	1.65472	1.09199e-15	8.37187e-14	8.47159	0.706142
lp28-3	BB_H25_-_hypothetical_protein	11.9547	6.42698	17.4824	2.72016	1.44369	0.00255554	0.00920393	1.99123	0.890891
lp28-3	BB_H26_-_hypothetical_protein	341.608	155.239	527.977	3.40105	1.76598	4.59484e-15	3.02603e-13	4.55726	0.373401
lp28-3	BB_H28_-_PF-32_protein	172.257	110.036	234.477	2.13092	1.09148	0.000409467	0.00206676	1.55716	0.671769
lp28-3	BB_H32_-_antigen_P35	297.097	111.141	483.053	4.34629	2.11979	2.93959e-20	4.51717e-18	4.43871	0.00114604
lp28-3	BB_H33_-_adenine_deaminase	59.733	32.9457	86.5204	2.62615	1.39295	0.000168178	0.000961119	0.732618	0.314358
lp28-3	BB_H37_-_lipoprotein	1461.82	750.525	2173.12	2.89547	1.5338	4.28339e-16	3.70246e-14	5.27161	0.123009
lp28-3	BB_H40_-_transposase-like_protein	30.6221	7.95332	53.2908	6.70045	2.74426	6.01137e-09	1.40235e-07	5.30385	0.0394536
lp28-4	BB_I19_-_hypothetical_protein	3430.59	903.895	5957.28	6.59068	2.72043	8.01994e-45	2.77289e-42	19.9157	0.221633
lp28-4	BB_I20_-_hypothetical_protein	873.032	222.999	1523.07	6.82993	2.77187	1.21941e-45	5.62149e-43	10.9557	0.00594991
lp28-4	BB_I21_-_PF-32_protein	2274.59	380.954	4168.23	10.9416	3.45175	1.71027e-72	1.18265e-69	15.4314	0.0644514
lp28-4	BB_I22_-_PF-49_protein	552.722	222.118	883.325	3.97682	1.99162	2.19049e-21	4.32778e-19	5.99767	0.133211
lp28-4	BB_I42_-_outer_membrane_protein	330.171	217.539	442.803	2.03551	1.02539	4.54672e-07	6.28811e-06	1.16649	1.0232
lp36	BB_K07_-_lipoprotein	83.6199	48.5072	118.732	2.44773	1.29144	3.70783e-06	3.79846e-05	0.821996	1.20763
lp36	BB_K13_-_hypothetical_protein	4598.49	2291.82	6905.17	3.01296	1.59118	1.15015e-15	8.37187e-14	4.57827	0.117569
lp36	BB_K24_-_PF-49_protein	251.155	153.983	348.326	2.26211	1.17767	1.45226e-06	1.68779e-05	1.82981	0.012947
lp36	BB_K32_-_fibronectin-binding_protein	130.582	68.0095	193.155	2.84011	1.50595	5.54123e-07	7.36877e-06	1.83968	0.179076
lp36	BB_K34_-_hypothetical_protein	105.919	70.2843	141.553	2.01401	1.01007	0.00213749	0.00812127	0.881278	0.389762
lp36	BB_K35_-_hypothetical_protein	291.998	136.748	447.248	3.2706	1.70956	7.99234e-14	4.19559e-12	1.31304	0.371114
lp36	BB_K40_-_hypothetical_protein	2733.97	1747.02	3720.91	2.12986	1.09076	1.08946e-08	2.35425e-07	3.20805	1.88185
lp36	BB_K45_-_immunogenic_protein_P37	6306.41	3440.66	9172.16	2.66581	1.41458	1.50818e-12	6.32063e-11	5.17702	0.0797172
lp36	BB_K49_-_hypothetical_protein	1069.68	710.388	1428.97	2.01153	1.0083	1.2744e-07	1.93681e-06	3.90151	0.334491
lp36	BB_K54_-_hypothetical_protein	37.9432	17.3375	58.5489	3.37702	1.75575	4.73621e-05	0.000321475	0.244277	0.130574
lp36	BB_L27_bdrP_protein_BdrP	770.311	505.54	1035.08	2.04748	1.03385	4.04736e-08	7.08544e-07	2.32608	0.49969
lp38	BB_J11_-_hypothetical_protein	14.8804	6.43141	23.3293	3.62741	1.85894	0.000944751	0.00413478	1.11093	0.00750708
lp38	BB_J46_-_hypothetical_protein	44.645	28.8692	60.4208	2.09292	1.06552	0.00222305	0.00837732	1.15389	0.332457
lp38	BB_J47_-_hypothetical_protein	128.267	72.8827	183.65	2.51981	1.33331	9.23716e-05	0.00057545	1.73933	1.12772
lp38	BB_J48_-_hypothetical_protein	241.993	80.6293	403.356	5.0026	2.32268	5.27994e-21	9.1277e-19	3.43166	0.238923
lp5	BB_T04_-_hypothetical_protein	37.9165	17.8092	58.0237	3.25808	1.70402	4.5966e-05	0.000316273	5.02131	0.442305
lp54	BB_A24_dbpA_decorin-binding_protein_A	59.7175	34.9336	84.5014	2.41892	1.27436	0.000447071	0.00220035	0.929723	0.00322634
lp54	BB_A25_dbpB_decorin-binding_protein_B	19.103	6.89777	31.3081	4.53888	2.18234	3.05774e-05	0.000221909	4.52757	0.196368
lp54	BB_A36_-_lipoprotein	24.9113	12.8853	36.9372	2.86663	1.51935	0.000418273	0.00209591	1.44433	0.60555
lp54	BB_A43_-_hypothetical_protein	775.773	439.526	1112.02	2.53004	1.33916	9.78497e-14	4.83308e-12	3.79012	2.0014
lp54	BB_A52_-_outer_membrane_protein	2096.47	1295.38	2897.56	2.23685	1.16147	7.85321e-10	2.26271e-08	3.61454	0.290641
lp54	BB_A54_-_hypothetical_protein	715.978	477.313	954.643	2.00004	1.00003	1.08053e-06	1.33426e-05	1.19371	0.0396014
lp54	BB_A57_-_P45-13	515.671	332.676	698.665	2.10014	1.07048	6.48358e-08	1.05492e-06	5.74583	3.19389
lp56	BB_Q03_-_outer_membrane_protein	80.9145	47.7836	114.045	2.38671	1.25502	0.000679887	0.00315531	1.2646	1.26501
lp56	BB_Q05_-_antigen,_P35	28.0078	16.9439	39.0717	2.30595	1.20536	0.00804832	0.0243031	1.06664	0.183033
lp56	BB_Q06_-_membrane_protein	997.506	661.18	1333.83	2.01735	1.01246	2.13088e-06	2.32047e-05	3.60434	1.14911
lp56	BB_Q07_-_plasmid_partition_protein	275.096	100.549	449.644	4.47188	2.16088	3.99288e-19	5.02014e-17	5.51028	0.510897
lp56	BB_Q22_-_hypothetical_protein	26.0886	13.1032	39.0741	2.98204	1.5763	0.00320436	0.0111347	1.98151	0.799925
lp56	BB_Q34_bdrW_protein_BdrW_protein	600.168	288.844	911.491	3.15566	1.65794	5.50227e-15	3.45893e-13	3.53094	0.156953
lp56	BB_Q37_-_hypothetical_protein	28.3608	13.8958	42.8258	3.08193	1.62383	0.00029993	0.00156529	2.66105	0.198055
lp56	BB_Q38_-_hypothetical_protein	3524.23	1248.46	5800.01	4.64572	2.2159	9.07151e-32	2.50918e-29	14.7755	1.09176
lp56	BB_Q39_-_hypothetical_protein	443.201	183.889	702.514	3.82032	1.93369	7.44065e-19	7.9157e-17	6.80293	0.0617317
lp56	BB_Q40_-_PF-32_protein	804.799	492.537	1117.06	2.26797	1.1814	5.49715e-08	9.05066e-07	2.73946	0.893467
lp56	BB_Q43_bppA_protein_BppA	25.1017	10.2087	39.9947	3.91772	1.97001	0.000134002	0.000798815	1.99894	0.160414
lp56	BB_Q45_bppC_protein_BppC	6.07653	1.15948	10.9936	9.4815	3.24512	0.000105667	0.00064378	0.820916	0.00513986
lp56	BB_Q54_-_hypothetical_protein	11.8021	4.6605	18.9438	4.06474	2.02316	0.001559	0.00626771	1.82512	0.0131845

## Sheet: B. Genes down in E vs S
Genes decreased in mid-exponential vs stationary
Genetic Element	Gene ID	Mean Expression	Early Expression	Stat Expression	Fold Change	Log2 Fold Change	P-Value	Adjusted P-Value	Stat Variance	Early Variance
Chromosome	BB_0009_-_hypothetical_protein	243.986	337.089	150.882	0.447603	-1.15971	0.000688147	0.00318297	0.856218	0.324111
Chromosome	BB_0012_truA_tRNA_pseudouridine_synthase_A	462.703	625.608	299.798	0.479211	-1.06127	0.000116001	0.000697522	0.665659	0.207197
Chromosome	BB_0013_-_hypothetical_protein	280.865	406.491	155.239	0.3819	-1.38873	5.53837e-06	5.35473e-05	0.563503	0.63994
Chromosome	BB_0014_priA_primosomal_protein_N	508.856	723.032	294.68	0.407562	-1.29491	6.64616e-07	8.59032e-06	0.495352	1.80422
Chromosome	BB_0040_cheR_chemotaxis_protein_methyltransferase	88.6028	125.791	51.4141	0.408725	-1.2908	0.00232854	0.00861063	0.286683	3.23787
Chromosome	BB_0077_-_hypothetical_protein	410.377	561.487	259.268	0.461752	-1.11481	2.69264e-05	0.000201293	0.522402	0.408995
Chromosome	BB_0196_prfA_peptide_chain_release_factor_1	521.821	717.69	325.953	0.454169	-1.1387	5.53689e-05	0.000369929	0.460718	0.146293
Chromosome	BB_0199_-_hypothetical_protein	592.711	871.85	313.572	0.359662	-1.47528	2.55869e-08	4.78197e-07	0.990556	2.79773
Chromosome	BB_0208_-_hypothetical_protein	432.564	622.479	242.648	0.38981	-1.35916	3.12009e-07	4.35867e-06	0.65938	2.30597
Chromosome	BB_0211_-_DNA_mismatch_repair_protein	1383.61	1858.16	909.063	0.489227	-1.03142	6.5406e-06	6.03043e-05	0.592978	0.866489
Chromosome	BB_0218_pstB_phosphate_ABC_transporter_ATP-binding_protein	413.038	585.132	240.944	0.411778	-1.28006	1.92293e-05	0.000149405	0.52495	0.741879
Chromosome	BB_0237_lnt_apolipoprotein_N-acyltransferase	359.598	491.113	228.083	0.464421	-1.10649	0.000421332	0.0020987	0.547544	0.518561
Chromosome	BB_0251_leuS_leucine--tRNA_ligase	4073.6	5802.44	2344.76	0.404099	-1.30722	3.36714e-08	6.04773e-07	1.20355	2.60969
Chromosome	BB_0252_-_hypothetical_protein	1572.38	2401.85	742.906	0.309306	-1.69289	1.71136e-11	6.22846e-10	1.01284	2.65867
Chromosome	BB_0255_-_M23_peptidase_domain-containing_protein	598.793	815.065	382.52	0.469312	-1.09138	7.80405e-06	6.96914e-05	0.48893	0.909038
Chromosome	BB_0317_-_integral_membrane_protein	1326.11	1815.65	836.573	0.460756	-1.11793	1.58802e-06	1.83019e-05	1.22093	1.19524
Chromosome	BB_0363_-_hypothetical_protein	1078.87	1609.28	548.467	0.340815	-1.55294	1.47537e-09	4.08087e-08	0.767839	1.43141
Chromosome	BB_0375_pfs_nucleosidase	1296.69	1772.01	821.37	0.463524	-1.10928	1.85772e-06	2.09782e-05	1.12649	2.30685
Chromosome	BB_0376_metK_S-adenosylmethionine_synthetase	1951.56	2811.93	1091.19	0.388055	-1.36567	1.13369e-07	1.7421e-06	0.451409	0.288817
Chromosome	BB_0399_-_hypothetical_protein	50.1391	71.3261	28.952	0.40591	-1.30077	0.00970226	0.02854	1.41102	0.362554
Chromosome	BB_0404_-_hypothetical_protein	92.8707	131.727	54.0144	0.410047	-1.28614	0.00966883	0.0285117	0.501071	1.65036
Chromosome	BB_0406_-_hypothetical_protein	311.163	421.83	200.496	0.475301	-1.07309	0.000518235	0.00249728	0.81825	0.0874122
Chromosome	BB_0409_-_hypothetical_protein	151.881	207.579	96.1833	0.463358	-1.1098	0.00118483	0.00496552	0.250222	1.5557
Chromosome	BB_0437_dnaA_chromosomal_replication_initiation_protein	948.679	1373.78	523.575	0.381119	-1.39169	7.22593e-08	1.14867e-06	0.875417	0.227172
Chromosome	BB_0450_rpoN_RNA_polymerase_sigma-54_factor	711.393	1145.83	276.955	0.241706	-2.04867	1.96049e-13	9.03787e-12	0.720532	1.07206
Chromosome	BB_0507_-_hypothetical_protein	563.033	804.033	322.032	0.400521	-1.32005	5.76874e-06	5.48556e-05	0.464272	0.490645
Chromosome	BB_0547_coaE_dephospho-CoA_kinase	272.976	378.513	167.44	0.442362	-1.1767	0.000515199	0.00249133	0.920478	0.537674
Chromosome	BB_0548_polA_DNA_polymerase_I	2139.09	3157.35	1120.83	0.354991	-1.49414	1.12573e-09	3.17731e-08	1.26159	1.35144
Chromosome	BB_0554_-_hypothetical_protein	2114.5	2883.93	1345.08	0.466404	-1.10035	1.53467e-05	0.000123398	2.11361	0.526954
Chromosome	BB_0555_-_hypothetical_protein	542.323	791.746	292.9	0.369942	-1.43463	2.02414e-06	2.22913e-05	1.54657	0.652484
Chromosome	BB_0586_-_FemA_protein	522.113	792.615	251.612	0.317445	-1.65542	4.85281e-09	1.17744e-07	0.966638	1.48387
Chromosome	BB_0603_p66_integral_outer_membrane_protein_p66	5527.13	7477.76	3576.49	0.478284	-1.06406	4.28878e-06	4.26718e-05	1.37915	0.905803
Chromosome	BB_0620_-_beta-glucosidase	227.936	324.319	131.554	0.405631	-1.30176	3.9629e-05	0.000276802	0.90164	1.42933
Chromosome	BB_0632_recD_exodeoxyribonuclease_V_subunit_alpha	236.725	373.486	99.9635	0.26765	-1.90158	4.42437e-08	7.46208e-07	0.678245	0.310082
Chromosome	BB_0633_recB_exodeoxyribonuclease_V_subunit_beta	628.2	932.898	323.502	0.346771	-1.52794	1.64958e-08	3.23131e-07	0.671011	0.43637
Chromosome	BB_0639_-_spermidine/putrescine_ABC_transporter_substrate-binding_protein	708.429	1106.98	309.877	0.27993	-1.83686	1.17069e-10	3.85493e-09	0.565838	0.41499
Chromosome	BB_0640_-_spermidine/putrescine_ABC_transporter_permease	358.717	562.988	154.445	0.274331	-1.86601	1.69962e-09	4.58164e-08	0.747837	0.893147
Chromosome	BB_0641_-_spermidine/putrescine_transport_system_permease	599.564	934.567	264.561	0.283084	-1.8207	1.16099e-10	3.85493e-09	1.0395	3.65069
Chromosome	BB_0642_-_spermidine/putrescine_ABC_transporter_ATP-binding_protein	1538.06	2194.66	881.461	0.40164	-1.31603	8.84916e-08	1.39073e-06	1.42934	0.631888
Chromosome	BB_0713_-_hypothetical_protein	2233.69	3165.93	1301.44	0.411076	-1.28252	4.66052e-07	6.38168e-06	1.73646	1.33242
Chromosome	BB_0739_-_hypothetical_protein	626.296	936.796	315.795	0.337101	-1.56875	1.31563e-07	1.97773e-06	1.50892	2.28951
Chromosome	BB_0751_-_hypothetical_protein	503.164	683.515	322.813	0.472284	-1.08227	9.44224e-06	8.06088e-05	0.759324	2.62243
Chromosome	BB_0752_-_hypothetical_protein	1510.48	2228.8	792.163	0.355422	-1.4924	4.41755e-10	1.32815e-08	0.738756	2.77453
Chromosome	BB_0753_-_hypothetical_protein	1200.79	1744.08	657.512	0.376997	-1.40737	2.62651e-08	4.84329e-07	0.705322	1.2357
Chromosome	BB_0754_-_ABC_transporter_ATP-binding_protein	998.056	1427.96	568.149	0.397874	-1.32962	3.87598e-08	6.87241e-07	0.556122	2.30013
Chromosome	BB_0755_rnz_ribonuclease_Z	643.012	865.15	420.874	0.486475	-1.03956	2.00011e-05	0.000154534	0.725682	2.63351
Chromosome	BB_0764_-_sensory_transduction_histidine_kinase	351.506	485.662	217.351	0.447535	-1.15993	6.86011e-05	0.000445424	0.86692	0.288844
Chromosome	BB_0765_-_hypothetical_protein	267.253	403.903	130.603	0.323353	-1.62882	5.10442e-07	6.85379e-06	0.77952	0.102641
Chromosome	BB_0766_cvpA_colicin_V_production_protein	288.255	394.905	181.604	0.459867	-1.12071	0.000281068	0.00148365	0.998513	0.301794
Chromosome	BB_0769_-_tRNA_N6-adenosine_threonylcarbamoyltransferase	879.209	1190.91	567.506	0.476531	-1.06936	1.53083e-05	0.000123398	1.11765	0.932107
Chromosome	BB_0771a_-_hypothetical_protein	199.708	270.007	129.408	0.479278	-1.06106	0.00235454	0.00868353	0.299843	0.181404
Chromosome	BB_0773_-_hypothetical_protein	208.488	322.975	94.001	0.291047	-1.78067	1.47919e-07	2.1763e-06	0.513231	0.447341
Chromosome	BB_0782_nadD_nicotinate-nucleotide_adenylyltransferase	447.519	620.892	274.145	0.441533	-1.17941	1.34717e-05	0.000111565	1.48785	0.40514
Chromosome	BB_0834_-_ATP-dependent_Clp_protease_subunit_C	3817.44	5166.9	2467.97	0.47765	-1.06598	4.08252e-06	4.09527e-05	0.865826	0.734816
Chromosome	BB_0835_-_phosphomannomutase	288.447	411.997	164.897	0.400238	-1.32107	8.32721e-06	7.28894e-05	0.585535	0.418295
Chromosome	BB_0838_-_hypothetical_protein	1933.2	2676.74	1189.67	0.444448	-1.16991	2.53392e-06	2.73782e-05	1.93566	0.0856894
lp54	BB_A10_-_hypothetical_protein	86.0939	115.209	56.9784	0.494564	-1.01577	0.009124	0.0271365	0.445135	0.540687
lp54	BB_A11_-_hypothetical_protein	58.7657	79.8589	37.6724	0.471737	-1.08395	0.0107316	0.030985	0.869514	0.756816
lp54	BB_A13_-_hypothetical_protein	78.6837	111.975	45.3923	0.405379	-1.30266	0.00267301	0.00955237	0.786503	0.0469149
lp54	BB_A20_-_PF-32_protein	704.793	973.181	436.405	0.448432	-1.15704	9.68546e-07	1.21773e-05	0.7823	2.27541
lp54	BB_A31_-_pbsx_family_phage_terminase	428.277	590.881	265.674	0.449623	-1.15321	5.24469e-05	0.000352107	0.865299	1.191
lp54	BB_A32_-_hypothetical_protein	46.2761	64.7394	27.8128	0.429611	-1.2189	0.0115544	0.0330159	0.0795558	0.399866
lp54	BB_A41_-_hypothetical_protein	254.197	366.149	142.245	0.38849	-1.36405	1.20838e-05	0.000100674	0.220679	0.254871
lp54	BB_A46_-_hypothetical_protein	333.148	446.416	219.881	0.492548	-1.02167	0.000114522	0.000691632	1.0493	6.03599
lp54	BB_A64_-_P35_antigen	16.6681	26.4142	6.9221	0.26206	-1.93203	0.016519	0.0444471	0.0706441	1.45387
cp26	BB_B06_-_chitibiose_transporter_protein_ChbB	94.7693	137.21	52.3283	0.381372	-1.39073	0.000567652	0.00271648	1.81232	0.470383
cp26	BB_B07_-_alpha3-beta1_integrin-binding_protein	360.9	533.882	187.917	0.351981	-1.50643	1.34024e-06	1.62592e-05	1.56575	1.02381
cp26	BB_B12_-_PF-32_protein	528.721	735.941	321.5	0.436856	-1.19477	4.08639e-06	4.09527e-05	0.560563	1.73175
cp26	BB_B13_-_plasmid_partition_protein	204.946	293.154	116.738	0.398213	-1.32839	3.15113e-05	0.000226875	1.22907	0.620923
lp28-1	BB_F25_-_hypothetical_protein	130.18	183.246	77.1131	0.420817	-1.24874	0.000202686	0.00112576	0.0325631	0.973044
cp32-8	BB_L08_-_hypothetical_protein	8.74132	14.6791	2.80349	0.190985	-2.38847	0.0051263	0.0170016	0.235344	0.0352269
cp32-8	BB_L21_-_hypothetical_protein	33.2603	48.5714	17.9492	0.369543	-1.43619	0.00778238	0.0237594	1.17981	0.375153
cp32-8	BB_L24_blyB_holin_protein	68.751	94.7196	42.7824	0.451674	-1.14665	0.0055227	0.0180288	0.071011	0.967267
cp32-8	BB_L25_-_hypothetical_protein	97.4346	134.207	60.6626	0.452009	-1.14558	0.00268418	0.00956758	0.435591	3.12008
cp32-8	BB_L26_-_hypothetical_protein	180.037	262.151	97.9236	0.373539	-1.42067	9.86447e-05	0.000609043	0.135487	0.72822
cp32-8	BB_L40_erpO_ErpB1_protein	4627.8	6458.99	2796.61	0.43298	-1.20763	9.15305e-06	7.87393e-05	0.883873	3.46482
cp32-6	BB_M25_-_hypothetical_protein	62.2407	97.1566	27.3248	0.281245	-1.8301	0.000102097	0.000627555	0.391966	1.13302
cp32-6	BB_M26_-_hypothetical_protein	119.899	191.112	48.6846	0.254743	-1.97288	2.82836e-06	3.00894e-05	0.226557	4.28178
cp32-6	BB_M33_-_PF-49_protein	175.688	244.759	106.617	0.435598	-1.19893	0.000294446	0.00154249	0.565623	1.44962
cp32-6	BB_M34_bdrK_BdrK	258.204	368.204	148.205	0.402506	-1.31292	1.35665e-06	1.63152e-05	0.313017	3.78878
cp32-9	BB_N25_-_hypothetical_protein	50.4308	71.331	29.5306	0.413995	-1.27232	0.0072777	0.0226181	0.321529	0.914053
cp32-9	BB_N39_erpQ_protein_ErpQ	1391.65	1863.01	920.299	0.493986	-1.01746	0.000143648	0.000841803	0.535452	2.65349
cp32-7	BB_O02_-_hypothetical_protein	24.0218	34.0725	13.9712	0.410043	-1.28615	0.0149605	0.041134	0.0652809	0.99879
cp32-7	BB_O21_-_hypothetical_protein	26.6053	38.0362	15.1744	0.398945	-1.32574	0.0149991	0.0411583	0.160812	0.257564
cp32-7	BB_O33_-_plasmid_partition_protein	202.812	287.789	117.836	0.409452	-1.28824	0.000143176	0.000841803	0.0641477	0.0542303
cp32-7	BB_O34_bdrM_protein_BdrM	231.456	313.773	149.139	0.475309	-1.07306	0.000196123	0.00109813	0.297949	1.31398
cp32-1	BB_P21_-_hypothetical_protein	31.5883	46.5601	16.6164	0.356882	-1.48648	0.00251858	0.00911832	0.514461	1.29007
cp32-1	BB_P25_-_hypothetical_protein	65.0844	95.2858	34.8829	0.366087	-1.44974	0.00124867	0.00520155	0.581334	0.924914
cp32-1	BB_P26_-_hypothetical_protein	163.825	237.121	90.528	0.381779	-1.38919	0.000102559	0.000627607	0.426408	0.152315
cp32-1	BB_P33_-_PF-49_protein	724.649	1040.44	408.856	0.392965	-1.34753	1.77303e-07	2.55426e-06	0.344418	0.995316
cp32-1	BB_P34_bdrA_protein_BdrA	853.096	1164.19	542.005	0.465565	-1.10295	7.81616e-06	6.96914e-05	0.540428	0.716053
cp32-1	BB_P39_erpB_protein_ErpB	4415.27	6107.2	2723.34	0.445923	-1.16513	1.57774e-05	0.000125403	0.735182	3.59631
cp32-4	BB_R25_-_hypothetical_protein	62.2975	94.5978	29.9972	0.317102	-1.65698	0.000625953	0.00292464	0.552444	1.28853
cp32-3	BB_R26_-_hypothetical_protein	105.702	144.8	66.6039	0.459973	-1.12038	0.00509133	0.0169262	0.478265	1.30126
cp32-3	BB_S21_-_hypothetical_protein	26.4219	38.1453	14.6984	0.385328	-1.37584	0.0144196	0.0403691	0.486943	0.664576
cp32-3	BB_S25_-_hypothetical_protein	63.9849	94.8499	33.12	0.349183	-1.51795	0.000814926	0.00369522	0.339981	0.00848363
lp21	BB_U07_-_protein_BBC01	93.2602	140.866	45.6545	0.324098	-1.6255	6.57096e-05	0.000428662	0.708042	0.0909651
lp21	BB_U08_-_SUA5_subfamily_protein	15.2869	24.9694	5.60438	0.22445	-2.15554	0.00490473	0.0164642	0.299031	1.01496
